# Supplementary material for: Cell–cell fusion of mesenchymal cells with distinct differentiations triggers genomic and transcriptomic remodelling toward tumour aggressiveness
Source: PubMed Central journal article supplement (PMC7729932; doi:10.1038/s41598-020-78502-z), 2020-12-10
Supplement: 41598_2020_78502_MOESM1_ESM.pdf [file 41598_2020_78502_MOESM1_ESM.pdf]

## Supplementary information

**Cell-cell fusion of mesenchymal cells with distinct differentiations triggers genomic and transcriptomic remodelling toward tumour aggressiveness**

Lucile Delespaul, Caroline Gélabert, Tom Lesluyes, Sophie Le Guellec, Gaëlle Pérot, Laura Leroy, Jessica Baud, Candice Merle, Lydia Lartigue & Frédéric Chibon

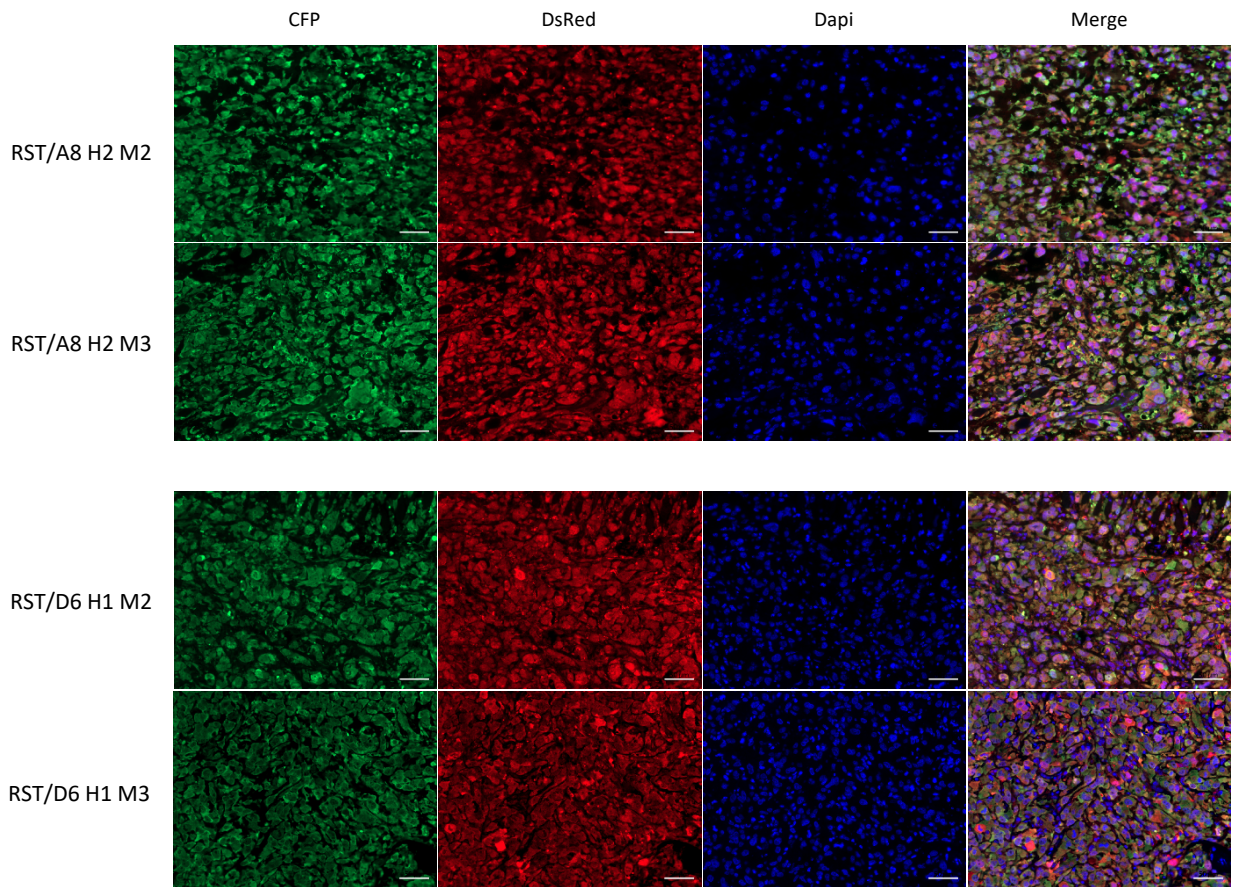

**Supplementary Figure 1: Immunofluorescence of hybrids tumours.** Scale bars = 50  $\mu\text{m}$ .

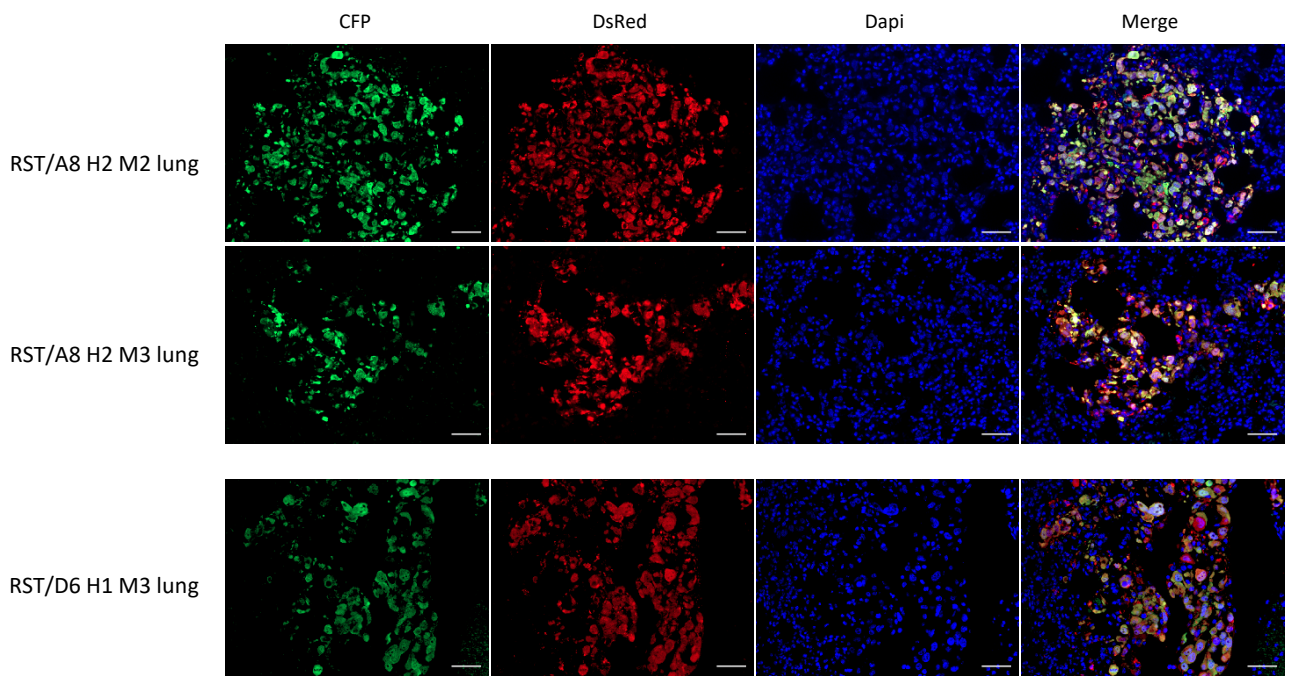

**Supplementary Figure 2: Immunofluorescence of hybrids lung metastases.** Scale bars = 50  $\mu\text{m}$ .

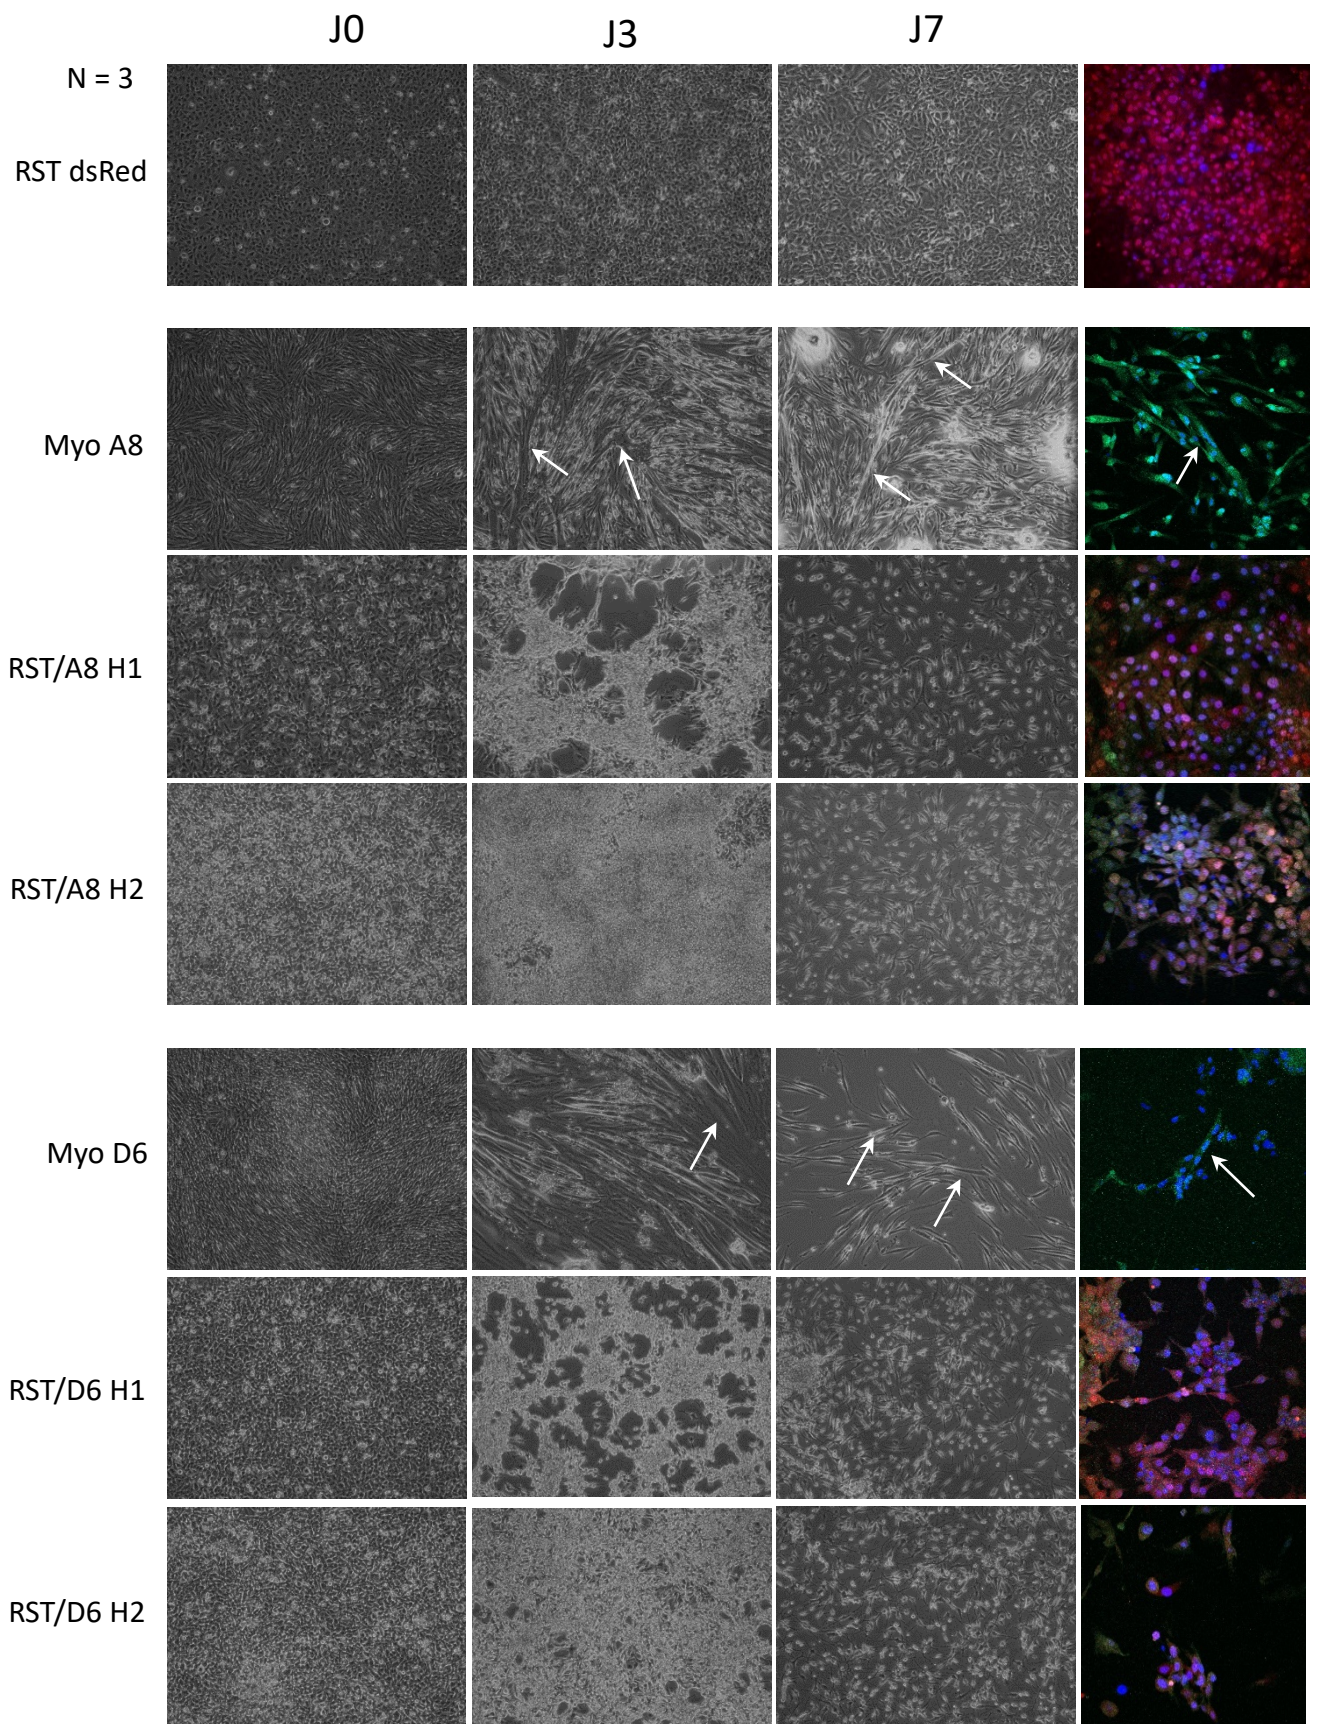

**Supplementary Figure 3: Hybrids do not conserve myotube differentiation ability.** Each cell line was cultured in differentiation medium for seven days and observed at day 0, 3 and 7. After 7 days, cells were fixed, nuclei were marked with Dapi (blue) and observed under confocal microscope. Myotubes are indicated with white arrows.

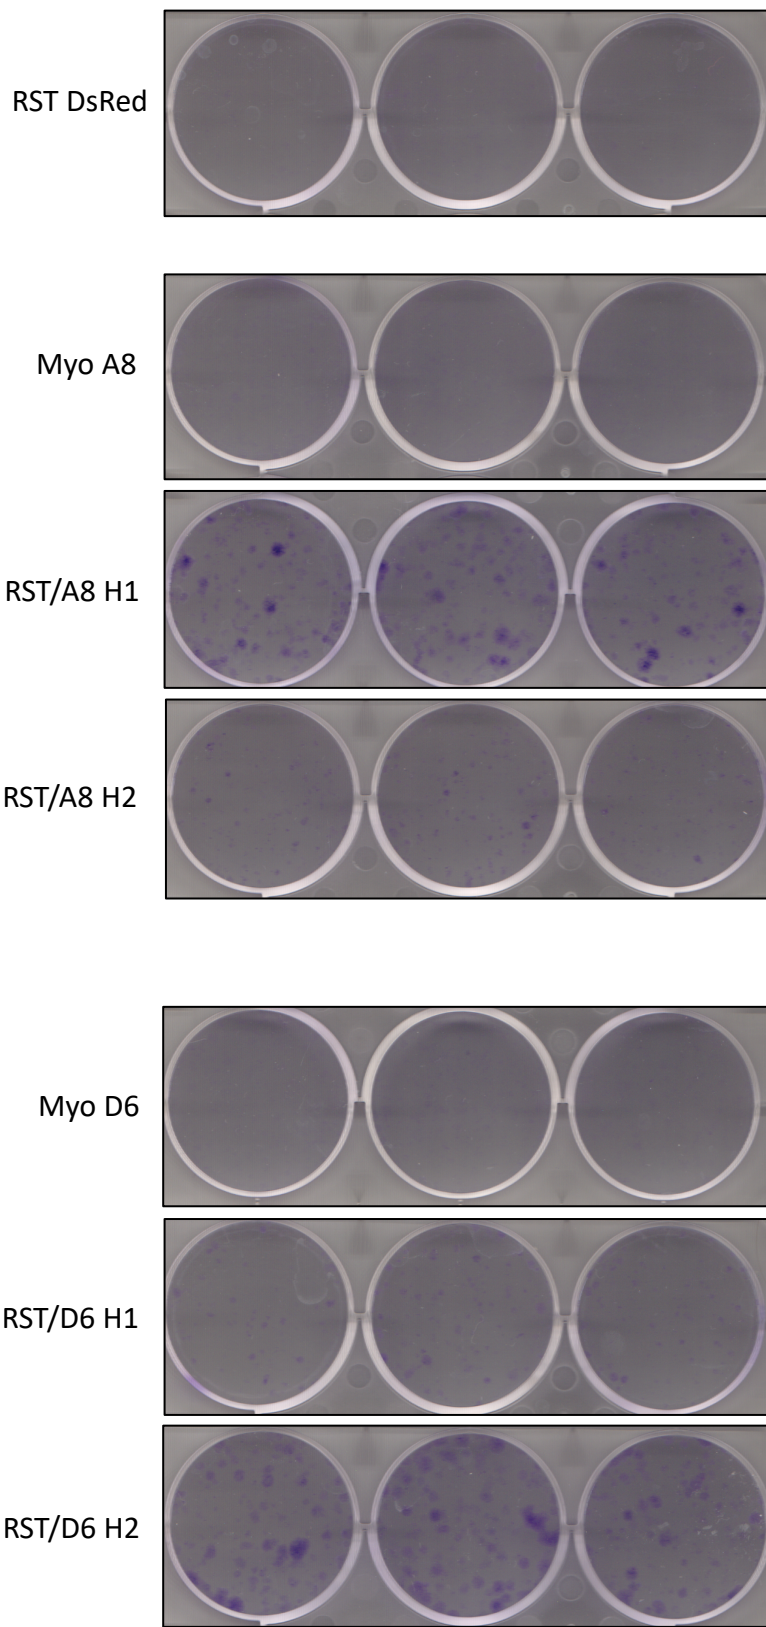

**Supplementary Figure 4: Hybrids acquire clonogenic ability compared with parent cells.** Colonies are marked with crystal violet. Experiment performed three times in triplicate.

**A**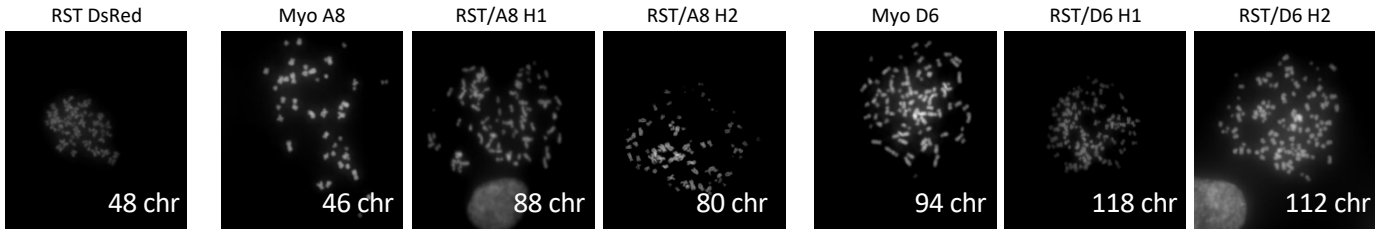**B**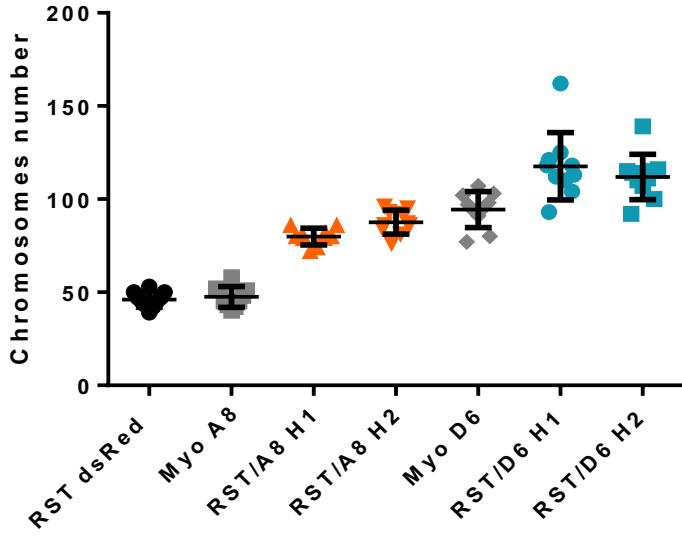

**Supplementary Figure 5: Chromosome number analysis** A). Chromosome spreads for each cell lines were performed and mean chromosome number is indicated (n=15). B) Average number of chromosomes of each cell line. Count performed on 15 metaphases. Mean and SD (black lines) are indicated.

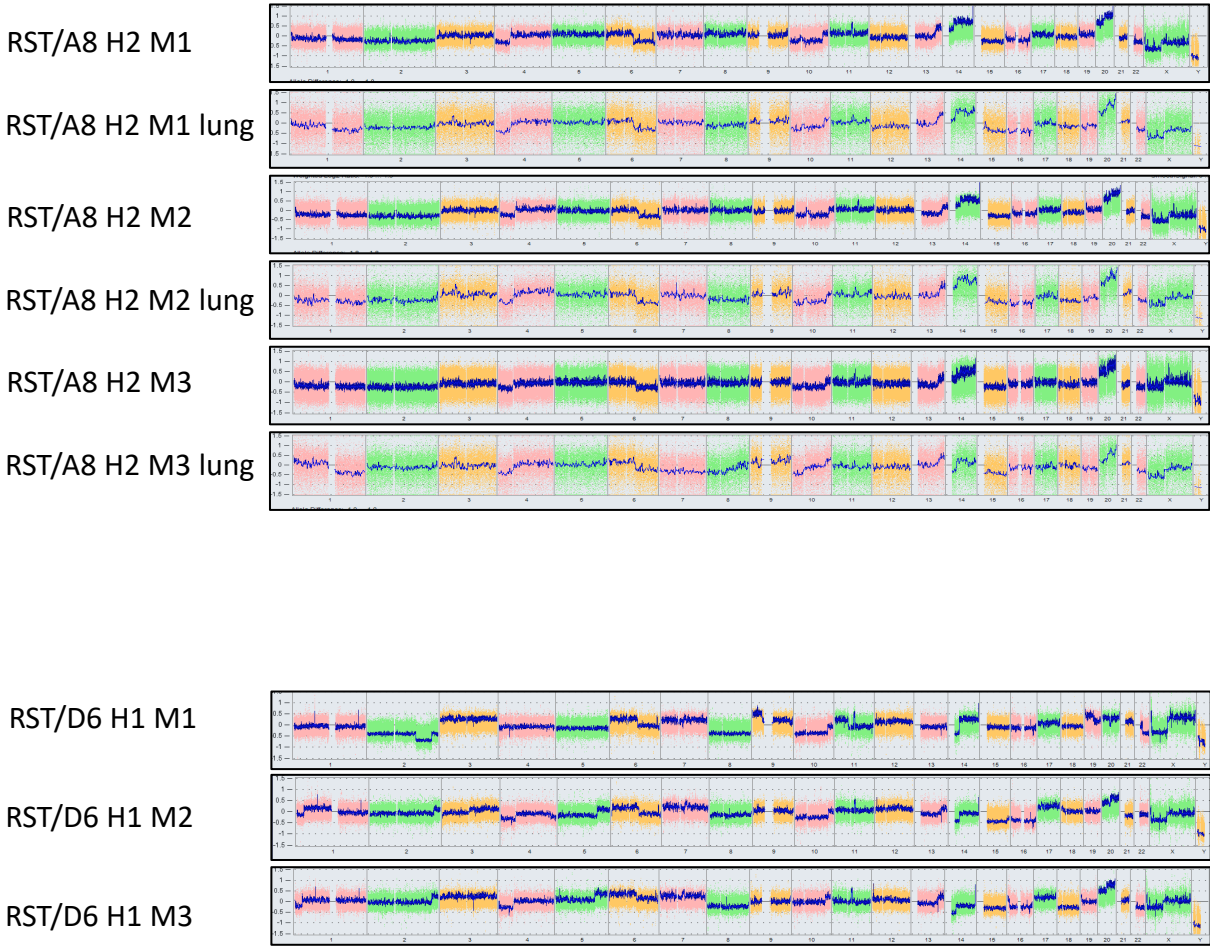

**Supplementary Figure 6: Genomic profiling of hybrids tumours and associated metastases.** Copy number variations (CNVs) demonstrate that hybrid genome is rearranged upon fusion. x axis: chromosome 1 to chromosome Y; y axis: log2 ratio.
